# Supplementary material for: Structural basis of human transcription–DNA repair coupling
Source: PubMed Central journal article supplement (PMC8514338; doi:10.1038/s41586-021-03906-4), 2021-09-15
Supplement: 41586_2021_3906_MOESM1_ESM.pdf [file 41586_2021_3906_MOESM1_ESM.pdf]

**Supplementary information**

---

**Structural basis of human transcription–  
DNA repair coupling**

---

In the format provided by the  
authors and unedited

# Supplementary Figure 1 | Uncropped gel images

Figure 2a

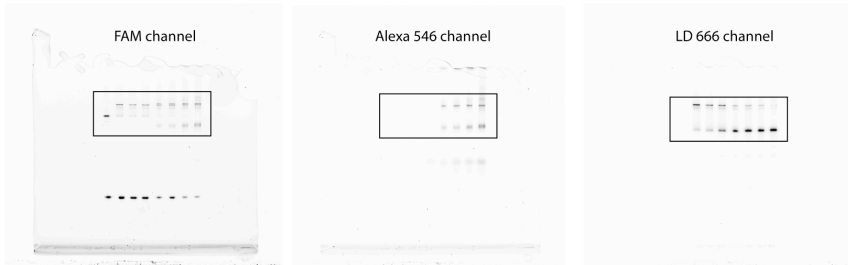

Figure 2b

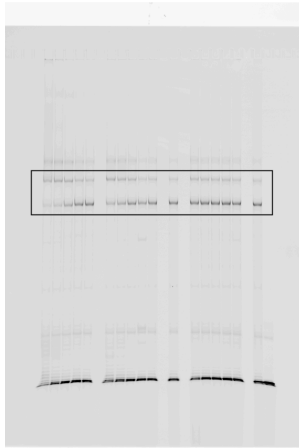

Extended Data Figure 1a

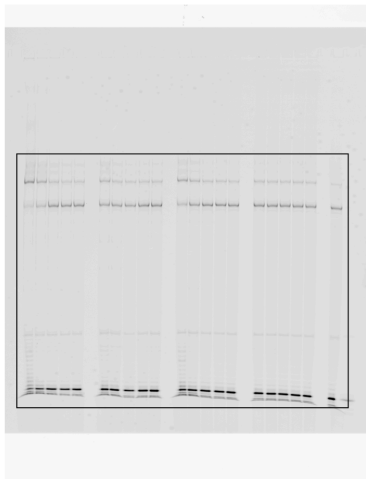

Extended Data Figure 1b (right) and 1f (left)

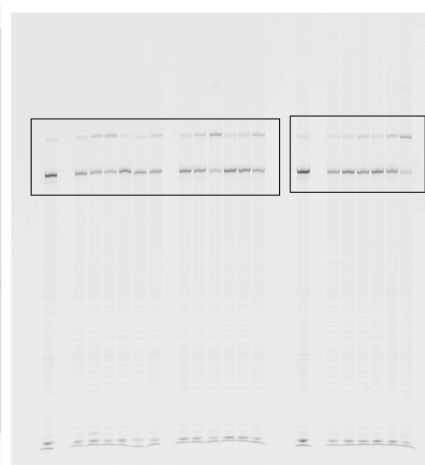

Figure 3a

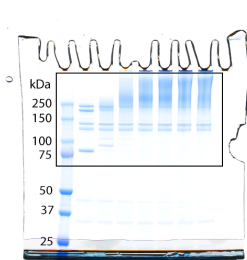

Extended Data Figure 8a

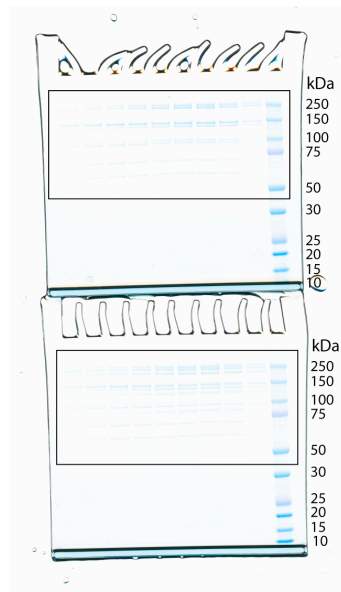

Extended Data Figure 9a

Western blot signal

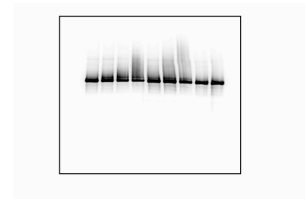

Marker

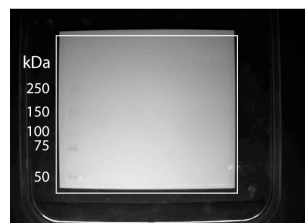

## Supplementary Table 1 | Supplementary Source Data

Extended Data Figure 1a

| Gel 1: | Arrest   | Bypass   | Background | Arrest-<br>Background | Bypass-<br>Background | Bypass /<br>Arrest |
|--------|----------|----------|------------|-----------------------|-----------------------|--------------------|
|        | 16598,20 | 13475,11 | 13017,00   | 3581,20               | 458,11                | 0,13               |
|        | 18847,40 | 14176,13 | 13017,00   | 5830,40               | 1159,13               | 0,20               |
|        | 20463,09 | 14364,52 | 13017,00   | 7446,09               | 1347,52               | 0,18               |
|        | 20703,62 | 14370,35 | 13017,00   | 7686,62               | 1353,35               | 0,18               |
|        | 21519,55 | 14638,65 | 13017,00   | 8502,55               | 1621,65               | 0,19               |
|        | 20883,29 | 14567,85 | 13017,00   | 7866,29               | 1550,85               | 0,20               |
|        | 19581,79 | 14363,41 | 13017,00   | 6564,79               | 1346,41               | 0,21               |
|        | 19508,71 | 14441,36 | 13017,00   | 6491,71               | 1424,36               | 0,22               |
|        | 18713,85 | 15357,71 | 13017,00   | 5696,85               | 2340,71               | 0,41               |
|        | 16678,22 | 16265,05 | 13017,00   | 3661,22               | 3248,05               | 0,89               |
|        | 16409,26 | 16251,79 | 13017,00   | 3392,26               | 3234,79               | 0,95               |
|        | 19226,62 | 14511,65 | 13017,00   | 6209,62               | 1494,65               | 0,24               |
|        | 19255,56 | 14688,77 | 13017,00   | 6238,56               | 1671,77               | 0,27               |
|        | 19034,01 | 15071,42 | 13017,00   | 6017,01               | 2054,42               | 0,34               |
|        | 17976,29 | 15577,36 | 13017,00   | 4959,29               | 2560,36               | 0,52               |
|        | 17281,89 | 16121,45 | 13017,00   | 4264,89               | 3104,45               | 0,73               |
|        | 20877,19 | 15059,31 | 13017,00   | 7860,19               | 2042,31               | 0,26               |
|        | 20966,19 | 15203,08 | 13017,00   | 7949,19               | 2186,08               | 0,28               |
|        | 18191,32 | 16354,85 | 13017,00   | 5174,32               | 3337,85               | 0,65               |
|        | 15742,80 | 17946,37 | 13017,00   | 2725,80               | 4929,37               | 1,81               |
|        | 16399,44 | 18662,71 | 13017,00   | 3382,44               | 5645,71               | 1,67               |

| Gel 2: | Arrest   | Bypass   | Background | Arrest-<br>Background | Bypass-<br>Background | Bypass /<br>Arrest |
|--------|----------|----------|------------|-----------------------|-----------------------|--------------------|
|        | 15077,52 | 12772,97 | 12519,60   | 2557,92               | 253,37                | 0,10               |
|        | 17754,71 | 13312,09 | 12519,60   | 5235,11               | 792,49                | 0,15               |
|        | 17721,40 | 13393,97 | 12519,60   | 5201,80               | 874,37                | 0,17               |
|        | 18287,04 | 13457,27 | 12519,60   | 5767,44               | 937,67                | 0,16               |
|        | 17212,79 | 13387,79 | 12519,60   | 4693,19               | 868,19                | 0,18               |
|        | 20692,83 | 14129,04 | 12519,60   | 8173,23               | 1609,44               | 0,20               |
|        | 17863,29 | 13563,76 | 12519,60   | 5343,69               | 1044,16               | 0,20               |
|        | 18014,53 | 13639,52 | 12519,60   | 5494,93               | 1119,92               | 0,20               |
|        | 17200,60 | 13994,54 | 12519,60   | 4681,00               | 1474,94               | 0,32               |
|        | 16254,19 | 14934,39 | 12519,60   | 3734,59               | 2414,79               | 0,65               |
|        | 15751,12 | 15091,77 | 12519,60   | 3231,52               | 2572,17               | 0,80               |
|        | 18658,64 | 13900,15 | 12519,60   | 6139,04               | 1380,55               | 0,22               |
|        | 18546,55 | 14094,75 | 12519,60   | 6026,95               | 1575,15               | 0,26               |
|        | 18040,13 | 14206,65 | 12519,60   | 5520,53               | 1687,05               | 0,31               |
|        | 19990,08 | 15666,74 | 12519,60   | 7470,48               | 3147,14               | 0,42               |

|  |          |          |          |         |         |      |
|--|----------|----------|----------|---------|---------|------|
|  | 17558,32 | 14844,60 | 12519,60 | 5038,72 | 2325,00 | 0,46 |
|  | 18284,04 | 13899,25 | 12519,60 | 5764,44 | 1379,65 | 0,24 |
|  | 19209,56 | 14151,90 | 12519,60 | 6689,96 | 1632,30 | 0,24 |
|  | 17259,64 | 14743,71 | 12519,60 | 4740,04 | 2224,11 | 0,47 |
|  | 14890,62 | 16101,19 | 12519,60 | 2371,02 | 3581,59 | 1,51 |
|  | 16454,53 | 18505,91 | 12519,60 | 3934,93 | 5986,31 | 1,52 |

| Gel 3: | Arrest   | Bypass   | Background | Arrest-Background | Bypass-Background | Bypass / Arrest |
|--------|----------|----------|------------|-------------------|-------------------|-----------------|
|        | 14207,48 | 10697,32 | 10350,23   | 3857,26           | 347,09            | 0,09            |
|        | 14268,11 | 10986,20 | 10350,23   | 3917,89           | 635,98            | 0,16            |
|        | 16111,87 | 11237,07 | 10350,23   | 5761,65           | 886,84            | 0,15            |
|        | 15467,33 | 11148,70 | 10350,23   | 5117,11           | 798,48            | 0,16            |
|        | 15389,34 | 11154,91 | 10350,23   | 5039,12           | 804,68            | 0,16            |
|        | 12264,56 | 10571,59 | 10350,23   | 1914,34           | 221,37            | 0,12            |
|        | 15018,03 | 11038,18 | 10350,23   | 4667,81           | 687,96            | 0,15            |
|        | 14516,15 | 10987,08 | 10350,23   | 4165,93           | 636,86            | 0,15            |
|        | 14797,46 | 11818,42 | 10350,23   | 4447,24           | 1468,20           | 0,33            |
|        | 12255,15 | 11898,33 | 10350,23   | 1904,93           | 1548,11           | 0,81            |
|        | 12903,09 | 12420,85 | 10350,23   | 2552,87           | 2070,63           | 0,81            |
|        | 14369,54 | 10821,69 | 10350,23   | 4019,32           | 471,47            | 0,12            |
|        | 14310,38 | 10923,74 | 10350,23   | 3960,16           | 573,51            | 0,14            |
|        | 14371,50 | 11248,08 | 10350,23   | 4021,28           | 897,86            | 0,22            |
|        | 13193,05 | 11386,84 | 10350,23   | 2842,83           | 1036,62           | 0,36            |
|        | 12232,09 | 11284,15 | 10350,23   | 1881,87           | 933,92            | 0,50            |
|        | 14894,75 | 10903,23 | 10350,23   | 4544,53           | 553,00            | 0,12            |
|        | 13474,88 | 10750,14 | 10350,23   | 3124,66           | 399,91            | 0,13            |
|        | 12830,22 | 11677,89 | 10350,23   | 2480,00           | 1327,67           | 0,54            |
|        | 11747,35 | 12829,48 | 10350,23   | 1397,13           | 2479,26           | 1,77            |
|        | 11243,67 | 11895,51 | 10350,23   | 893,45            | 1545,29           | 1,73            |

Extended Data Figure 1b

| Gel 1: | Arrested | Bypass   | Background | Arrested-Background | Bypass-Background | Bypass/Arrest |
|--------|----------|----------|------------|---------------------|-------------------|---------------|
|        | 10845,08 | 4143,594 | 3192,828   | 7652,252            | 950,766           | 0,124246562   |
|        | 6861,507 | 3992,49  | 3192,828   | 3668,679            | 799,662           | 0,21797001    |
|        | 8242,056 | 4171,756 | 3192,828   | 5049,228            | 978,928           | 0,193876767   |
|        | 7192,465 | 4630,257 | 3192,828   | 3999,637            | 1437,429          | 0,359389865   |
|        | 8190,376 | 4179,051 | 3192,828   | 4997,548            | 986,223           | 0,197341376   |
|        | 6899,572 | 4584,691 | 3192,828   | 3706,744            | 1391,863          | 0,375494774   |
|        | 4943,623 | 5861,065 | 3192,828   | 1750,795            | 2668,237          | 1,524014519   |

| Gel 2: | Bypass   | Arrested  | Background | Bypass-Background | Arrested-Background | Bypass/Arrest |
|--------|----------|-----------|------------|-------------------|---------------------|---------------|
|        | 7007,592 | 17491,618 | 5551,051   | 1456,541          | 11940,567           | 0,121982566   |
|        | 6754,002 | 10801,072 | 5551,051   | 1202,951          | 5250,021            | 0,229132607   |
|        | 7100,345 | 13014,182 | 5551,051   | 1549,294          | 7463,131            | 0,207593033   |
|        | 7728,522 | 11756,678 | 5551,051   | 2177,471          | 6205,627            | 0,350886542   |
|        | 7018,609 | 13128,217 | 5551,051   | 1467,558          | 7577,166            | 0,193681648   |
|        | 7964,267 | 11713,918 | 5551,051   | 2413,216          | 6162,867            | 0,391573597   |
|        | 9834,619 | 8466,195  | 5551,051   | 4283,568          | 2915,144            | 1,469419006   |

Extended Data Figure 1f

| Gel 1: | Arrested  | Bypass   | Background | Arrested-Background | Bypass-Background | Bypass/Arrest |
|--------|-----------|----------|------------|---------------------|-------------------|---------------|
|        | 11014,099 | 4279,178 | 3192,828   | 7821,271            | 1086,35           | 0,138896862   |
|        | 7401,125  | 4292,115 | 3192,828   | 4208,297            | 1099,287          | 0,261218968   |
|        | 5969,6    | 4728,349 | 3192,828   | 2776,772            | 1535,521          | 0,552987786   |
|        | 6013,226  | 5289,181 | 3192,828   | 2820,398            | 2096,353          | 0,743282686   |
|        | 8001,517  | 4334,208 | 3192,828   | 4808,689            | 1141,38           | 0,237357833   |
|        | 7351,52   | 4166,117 | 3192,828   | 4158,692            | 973,289           | 0,234037289   |
|        | 7338,581  | 4730,138 | 3192,828   | 4145,753            | 1537,31           | 0,370815627   |
|        | 7952,121  | 4273,792 | 3192,828   | 4759,293            | 1080,964          | 0,227127012   |
|        | 7385,704  | 4782,054 | 3192,828   | 4192,876            | 1589,226          | 0,37903005    |
|        | 5459,253  | 6073,669 | 3192,828   | 2266,425            | 2880,841          | 1,271094786   |
|        | 7970,171  | 4083,306 | 3192,828   | 4777,343            | 890,478           | 0,186396078   |
|        | 8417,011  | 4588,288 | 3192,828   | 5224,183            | 1395,46           | 0,267115451   |
|        | 6936,594  | 5211,072 | 3192,828   | 3743,766            | 2018,244          | 0,539094591   |

| Gel 2: | Bypass   | Arrested  | Background | Bypass-Background | Arrest-Background | Bypass/Arrest |
|--------|----------|-----------|------------|-------------------|-------------------|---------------|
|        | 7032,744 | 16207,859 | 5551,051   | 1481,693          | 10656,808         | 0,139037224   |
|        | 7105,702 | 11537,269 | 5551,051   | 1554,651          | 5986,218          | 0,259705042   |
|        | 7967,56  | 9933,522  | 5551,051   | 2416,509          | 4382,471          | 0,551403306   |
|        | 8716,105 | 9578,896  | 5551,051   | 3165,054          | 4027,845          | 0,785793396   |
|        | 6828,592 | 12163,638 | 5551,051   | 1277,541          | 6612,587          | 0,193198365   |
|        | 6692,575 | 10482,717 | 5551,051   | 1141,524          | 4931,666          | 0,23146823    |
|        | 7597,677 | 10792,836 | 5551,051   | 2046,626          | 5241,785          | 0,390444476   |
|        | 7161,159 | 12355,074 | 5551,051   | 1610,108          | 6804,023          | 0,236640587   |
|        | 7883,958 | 11269,946 | 5551,051   | 2332,907          | 5718,895          | 0,407929679   |
|        | 9921,152 | 8846,943  | 5551,051   | 4370,101          | 3295,892          | 1,325923604   |
|        | 7170,359 | 13556,043 | 5551,051   | 1619,308          | 8004,992          | 0,202287273   |
|        | 7775,074 | 12657,583 | 5551,051   | 2224,023          | 7106,532          | 0,312954758   |
|        | 8505,375 | 10627,705 | 5551,051   | 2954,324          | 5076,654          | 0,581943146   |

## Extended Data Figure 1h

ATPase rate for replicates is reported (nM/min)

| Sample                    | Replicate 1 | Replicate 2 | Replicate 3 |
|---------------------------|-------------|-------------|-------------|
| CsB                       | 7,9         | 5,0         | 9,5         |
| CsB+DNA                   | 30,0        | 24,0        | 25,9        |
| CsB+EC                    | 29,6        | 23,2        | 31,9        |
| CsB F796A                 | 6,2         | 3,2         | 7,3         |
| CsB F796A+DNA             | 22,1        | 17,7        | 20,0        |
| CsB F796A+EC              | 18,7        | 17,0        | 18,3        |
| CsB+CsA+DDB1+UVSSA+EC     | 43,2        | 37,9        | 47,1        |
| CsB+CsA+DDB1+UVSSA+EC+PAF | 46,4        | 43,4        | 53,5        |
